# Supplementary material for: The acetyltransferase Tip60 contributes to mammary tumorigenesis by modulating DNA repair
Source: PubMed Central journal article supplement — Cell Death Differ. 2016 Feb 26;23(7):1198–208. doi: 10.1038/cdd.2015.173 (PMC4946888; doi:10.1038/cdd.2015.173), 2016-02-26
Supplement: cdd2015173x7.pdf [file cdd2015173x7.pdf]

**Supplemental Table 1.** Primers used for genomic DNA PCR.

| <b>Gene</b>  | <b>Primer sequence</b>    |
|--------------|---------------------------|
| mTip60_wt_F  | TCGCCAGAACACTGCCTCTAGACAA |
| mTip60_wt_R  | GTCACTCACGCCACTCATCTTCGTT |
| mTip60_mut_R | GCCTGCTCTTTACTGAAGGCTCTT  |
