# Supplementary material for: The acetyltransferase Tip60 contributes to mammary tumorigenesis by modulating DNA repair
Source: PubMed Central journal article supplement — Cell Death Differ. 2016 Feb 26;23(7):1198–208. doi: 10.1038/cdd.2015.173 (PMC4946888; doi:10.1038/cdd.2015.173), 2016-02-26
Supplement: cdd2015173x8.pdf [file cdd2015173x8.pdf]

**Supplemental Table 2.** Primers used for RT-PCR.

| <b>Gene</b>         | <b>Primer sequence</b>  |
|---------------------|-------------------------|
| <i>tip60_F</i>      | AACCAGGACAACGAAGATGAGTG |
| <i>tip60_R</i>      | TGATGTCCTTCACGCTCAGG    |
| <i>pumal/bbc3_F</i> | TCACCCTGGAGGGTCATGTA    |
| <i>pumal/bbc3_R</i> | GCGGGTGTAGGCACCTAGT     |
| <i>p21/cdkn1A_F</i> | CCACTTTGCCAGCAGAATAA    |
| <i>p21/cdkn1A_R</i> | ACGGGACCGAAGAGACAAC     |
| <i>polq_F</i>       | CTCATACTCCGCCGTTCTTC    |
| <i>polq_R</i>       | TAGTGCGGAGGTAGAGGTGG    |
| <i>pdss1_F</i>      | CATAATAATGCCCGATTTCGAT  |
| <i>pdss1_R</i>      | GCTGGCTTGCATCTCTCTAA    |
| <i>dut_F</i>        | CCCCAACGTTTCCTCTGTAA    |
| <i>dut_R</i>        | CCTTCTGGGTGCTATGGAAG    |
| <i>exo1_F</i>       | TATGAGAATCGGCTTGACCC    |
| <i>exo1_R</i>       | TGTGCTGAAAAGCTAGCCAA    |
| <i>aspm_F</i>       | AGGATCCCTGCAATAAGTCG    |
| <i>aspm_R</i>       | TTCTCTCTGTGCCTGTCCAC    |
| <i>hspe1_F</i>      | CTGACAGGTTCAATCTCTCCAC  |
| <i>hspe1_R</i>      | AGGTGGCATTATGCTTCCAG    |
| <i>mtbp_F</i>       | ACCTTGCAGCAGGAGATGAT    |
| <i>mtbp_R</i>       | TGGCCTCAAGAAAGTGGAAG    |
| <i>kif14_F</i>      | AAATGCTTCAGGAGAATCGG    |
| <i>kif14_R</i>      | CATCGTGGAGAGTTTCATGG    |
| <i>Tp53_F</i>       | ACTGCATGGACGATCTGTTG    |
| <i>Tp53_R</i>       | GTGACAGGGTCCTGTGCTG     |
