# Supplementary figures and images for: The acetyltransferase Tip60 contributes to mammary tumorigenesis by modulating DNA repair
Source: PubMed Central journal article supplement — Cell Death Differ. 2016 Feb 26;23(7):1198–208. doi: 10.1038/cdd.2015.173 (PMC4946888; doi:10.1038/cdd.2015.173), 2016-02-26

Supplementary Figure 1

A

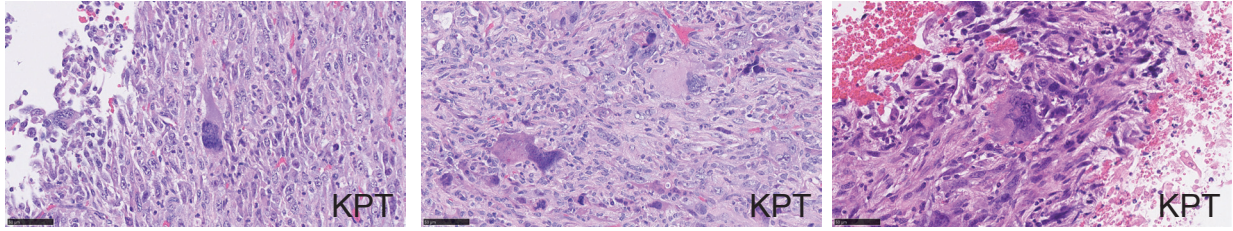

B

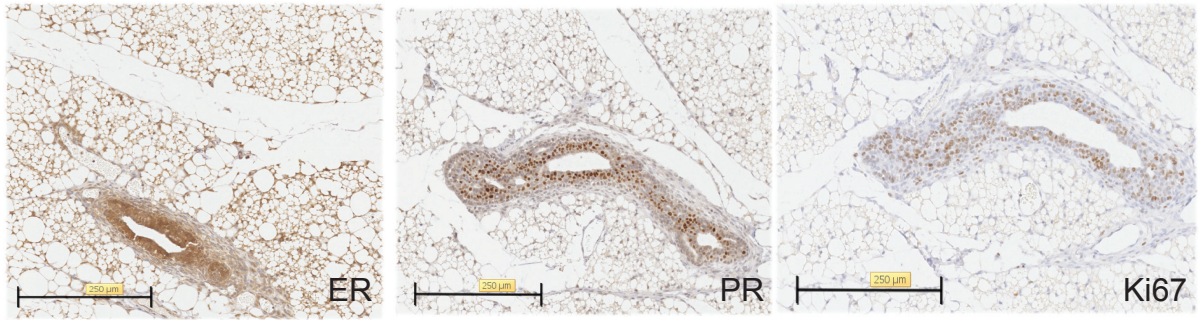

C

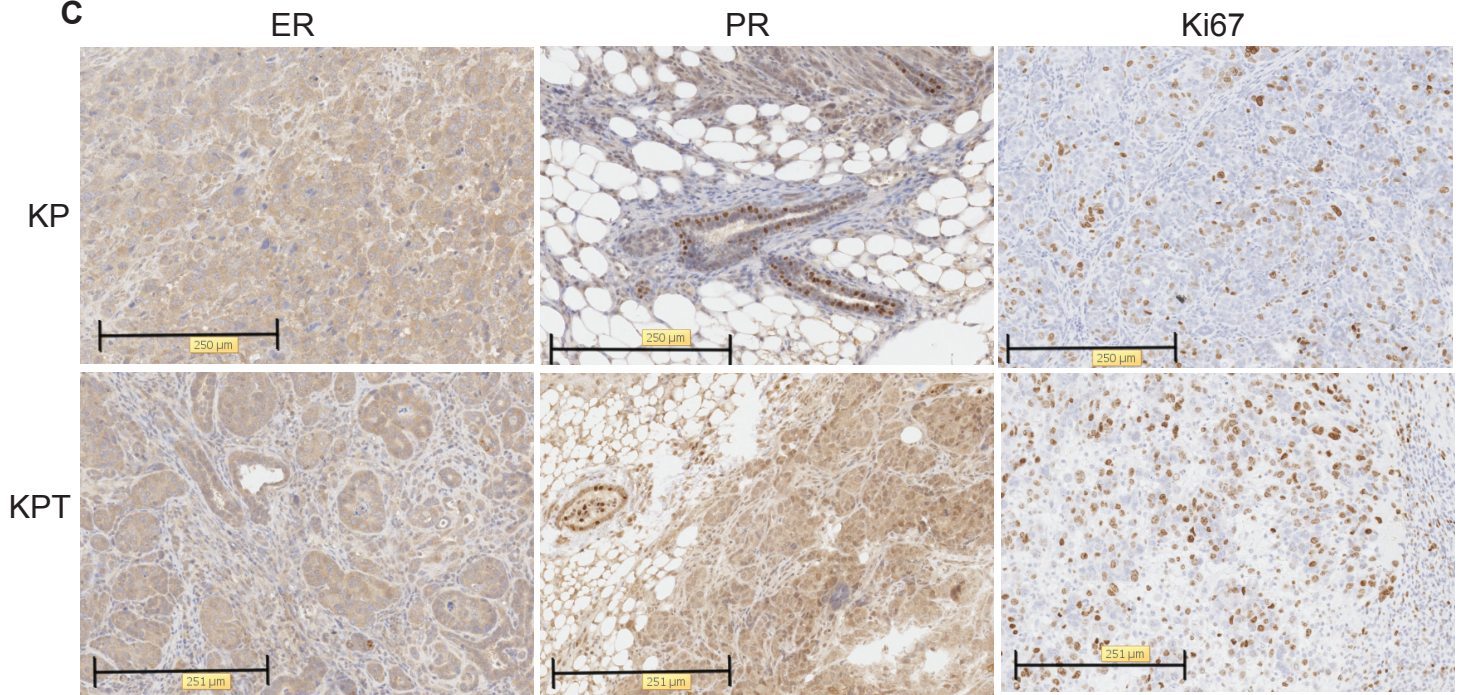

D

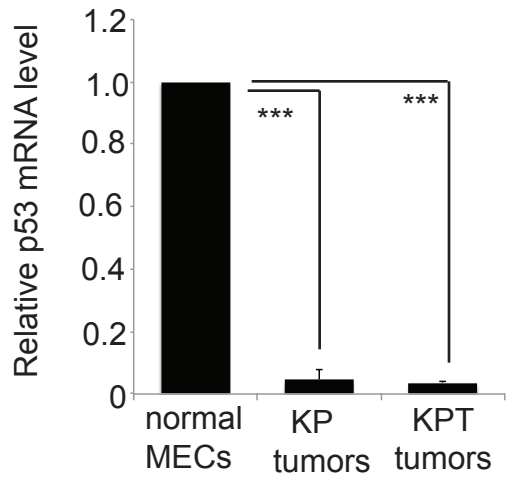

Supplement: cdd2015173x1.pdf [file cdd2015173x1.pdf]

Supplementary Figure 2

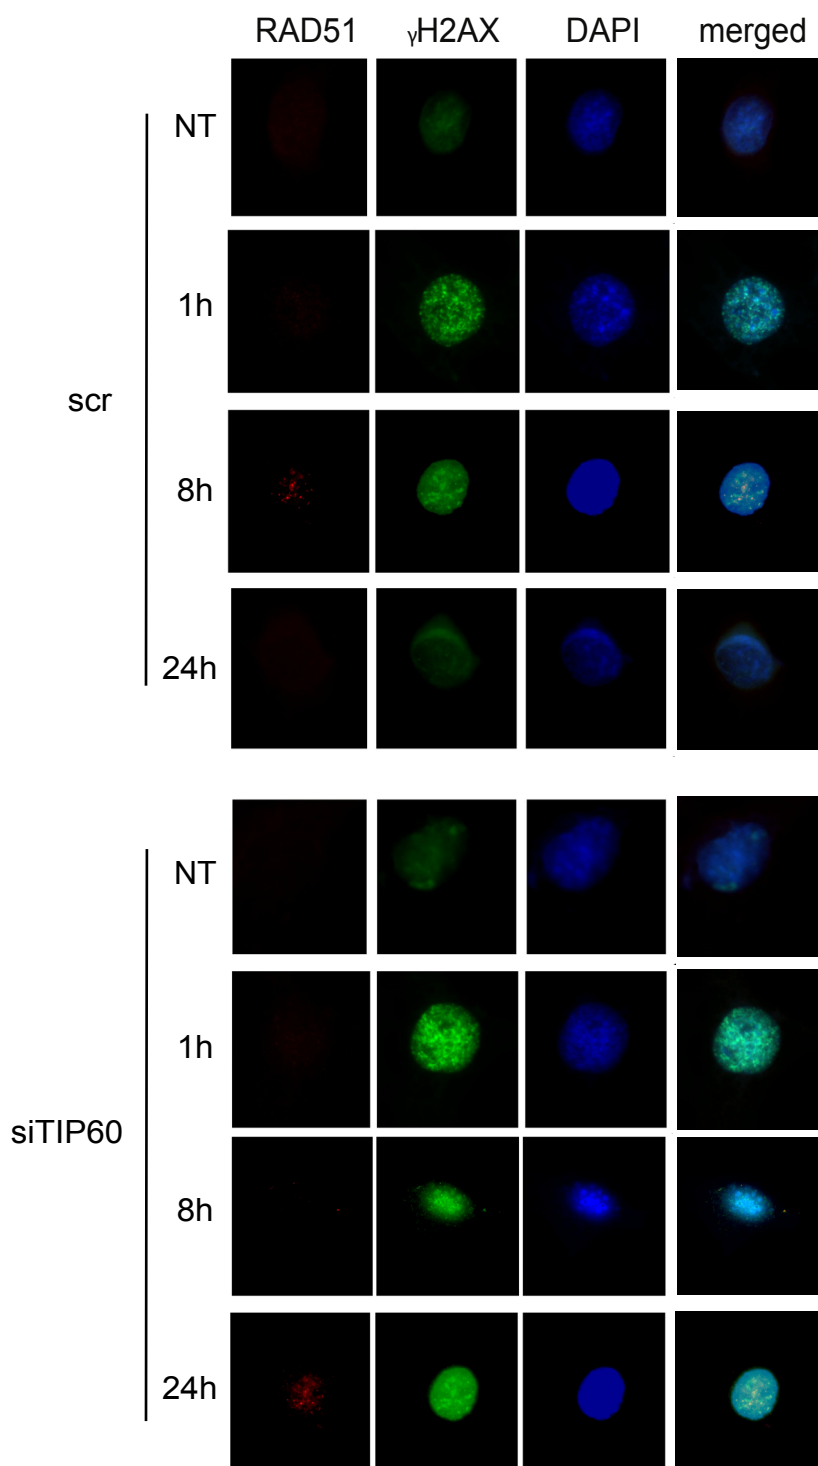

Supplement: cdd2015173x2.pdf [file cdd2015173x2.pdf]

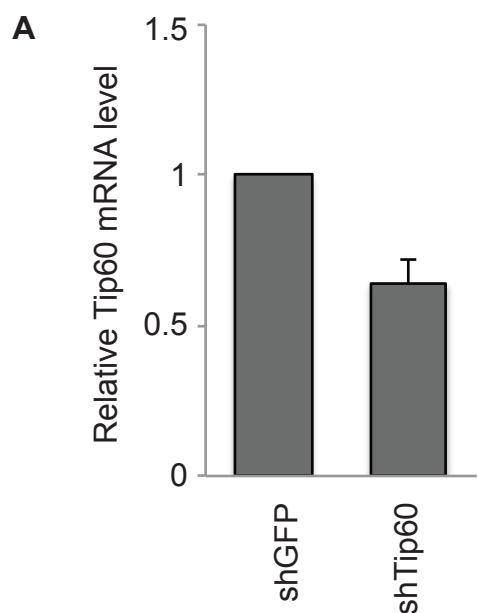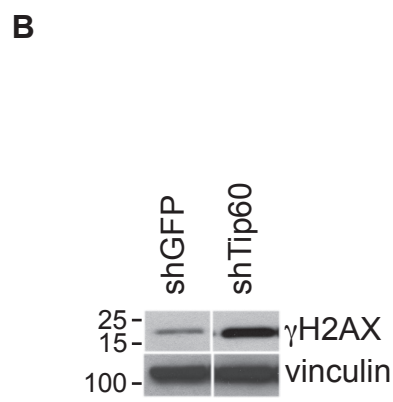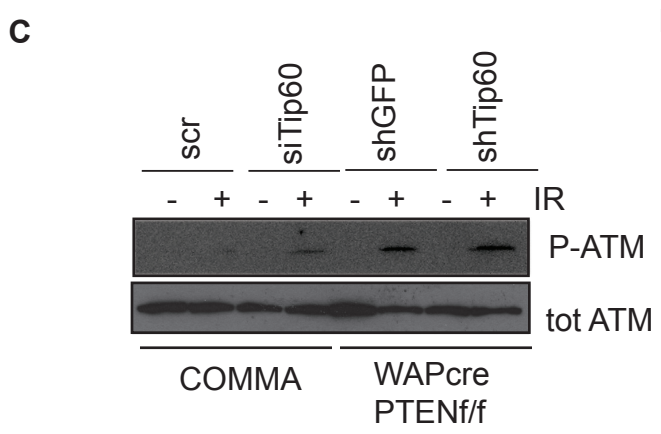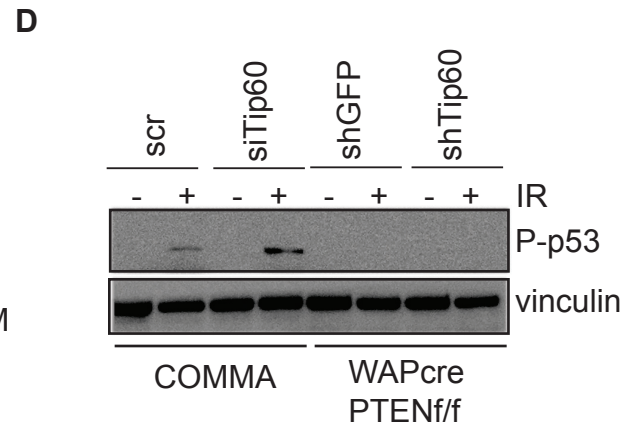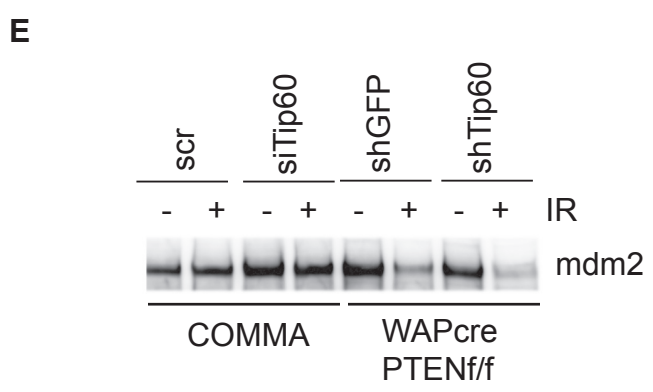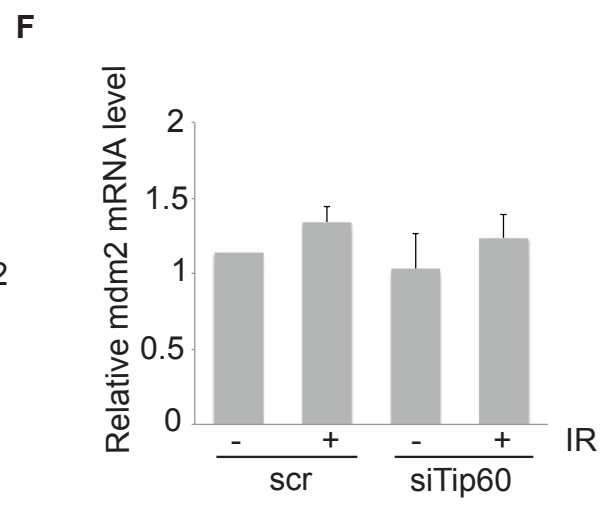

Supplement: cdd2015173x3.pdf [file cdd2015173x3.pdf]

Supplementary Figure 4

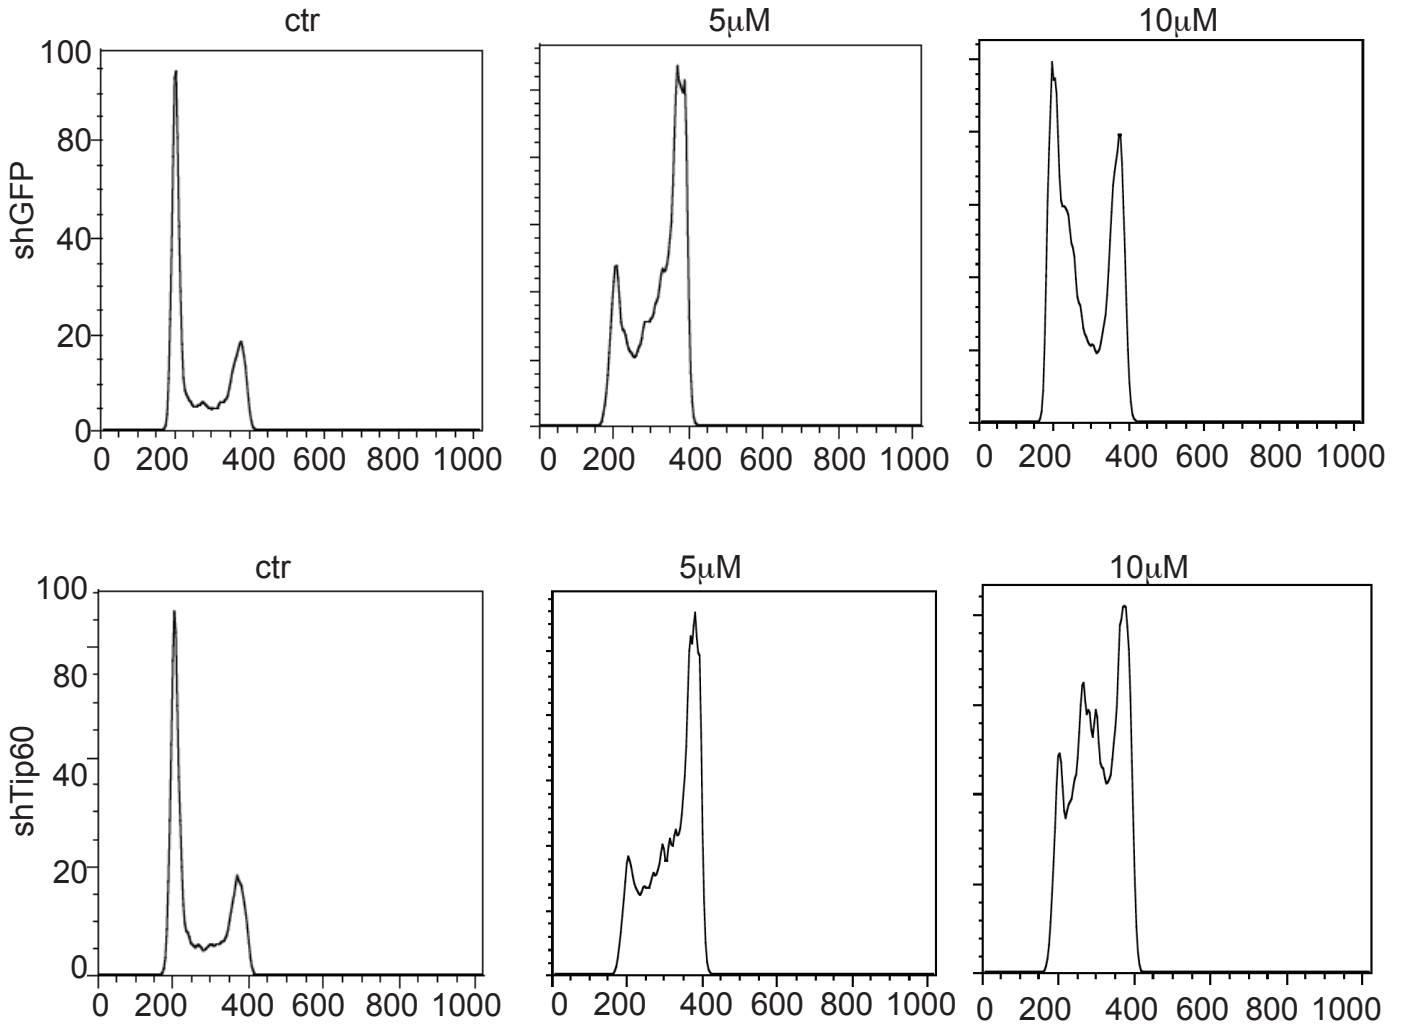

Supplement: cdd2015173x4.pdf [file cdd2015173x4.pdf]

Supplementary Figure 5

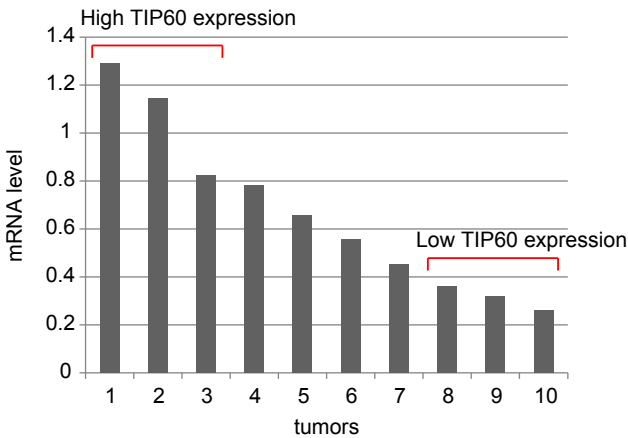

Supplement: cdd2015173x5.pdf [file cdd2015173x5.pdf]

Supplementary Figure 6

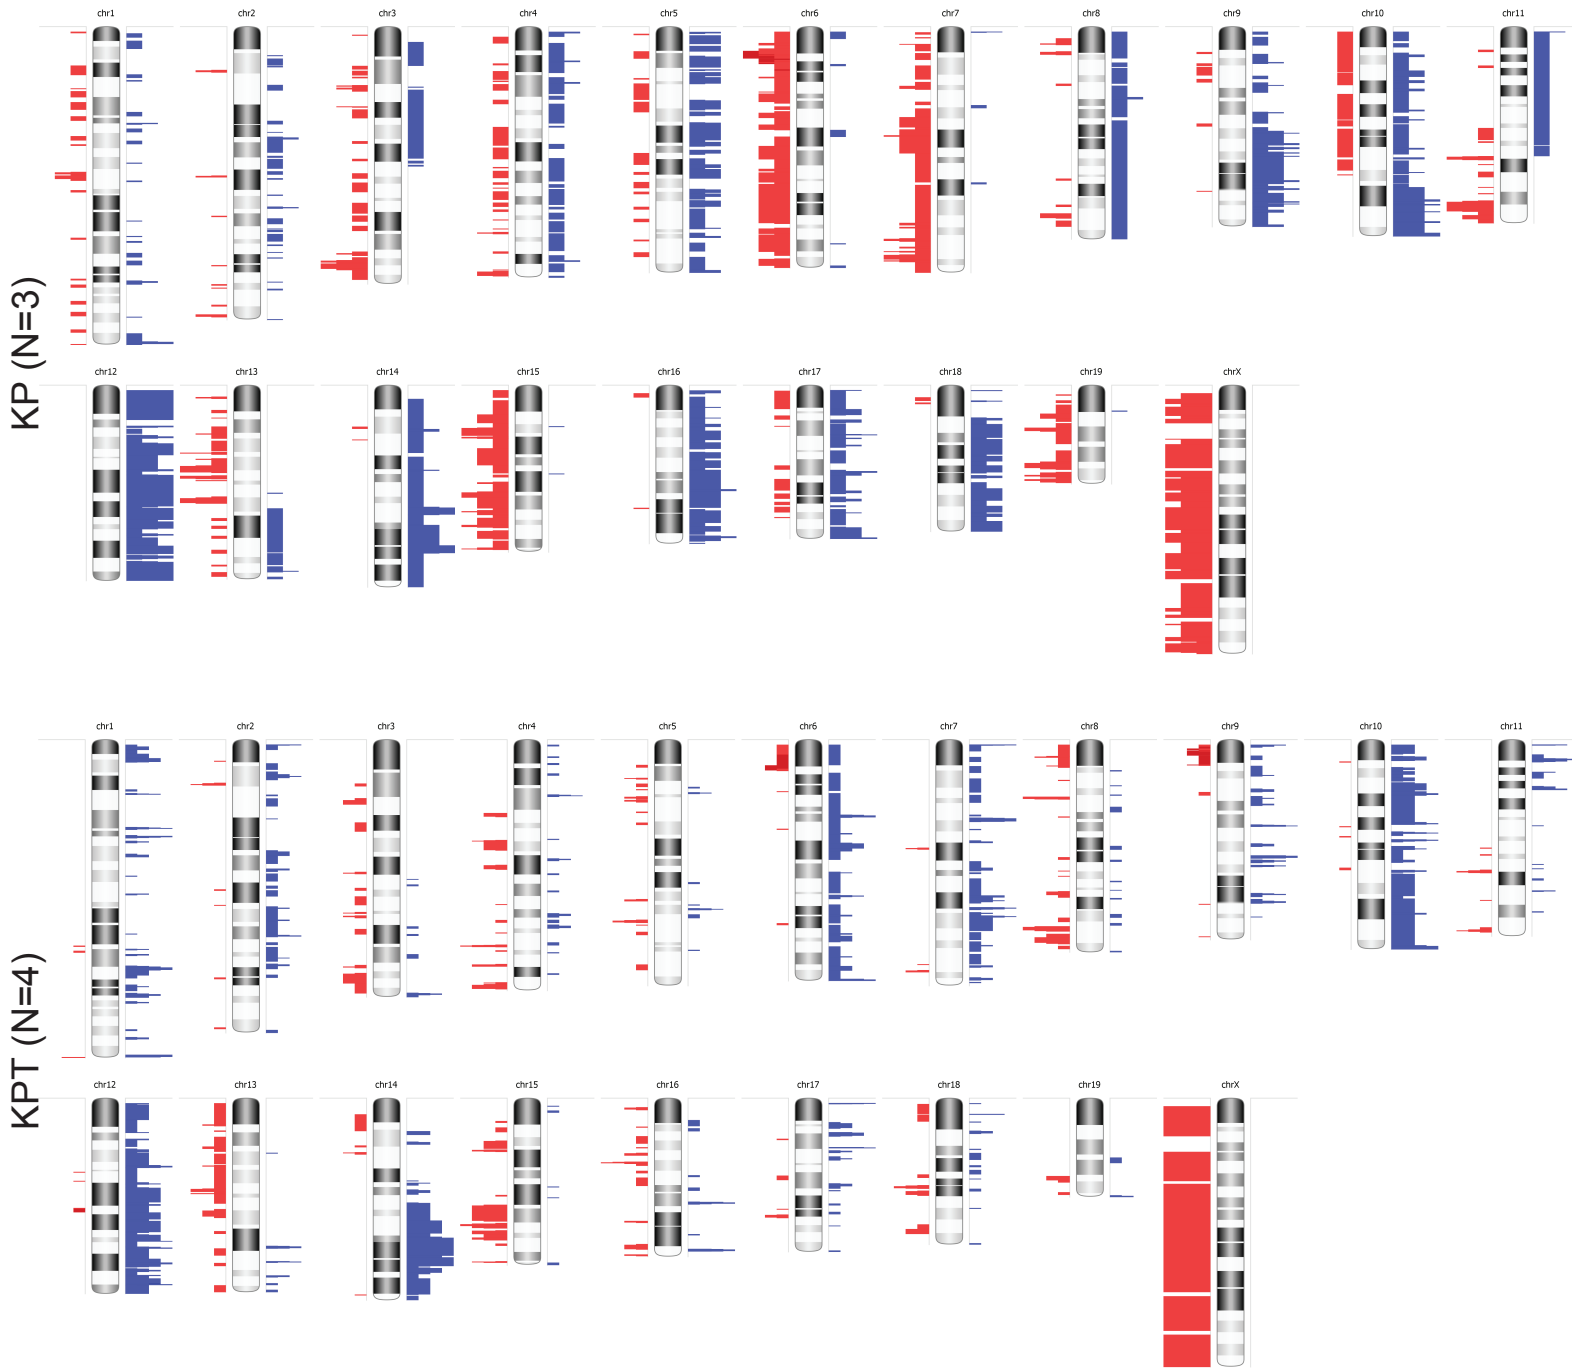

Supplement: cdd2015173x6.pdf [file cdd2015173x6.pdf]
